# Supplementary material for: What Can Causal Networks Tell Us about Metabolic Pathways?
Source: PubMed Central journal article supplement (PMC3320578; doi:10.1371/journal.pcbi.1002458), 2012-04-05
Supplement: pcbi.1002458.s004.pdf [file pcbi.1002458.s004.pdf]

**Table S1: Aliphatic metabolites in the Bay ×Sha population**

| Phenotype                             | Abbreviation | # of lines below detection level |
|---------------------------------------|--------------|----------------------------------|
| 3-Methylthiopropyl-glucosinolate      | MT3          | 45                               |
| Allyl-glucosinolate                   | Allyl        | 201                              |
| 3-Hydroxypropyl-glucosinolate         | OHP3         | 7                                |
| 4-Methylthiobutyl-glucosinolate       | MT4          | 203                              |
| 4-Methylsulphinylbutyl-glucosinolate  | MSO4         | 183                              |
| 3-Butenyl-glucosinolate               | But-3-enyl   | 158                              |
| 7-Methylthio-heptyl-glucosinolate     | MT7          | 230                              |
| 8-Methylthio-octyl-glucosinolate      | MT8          | 1                                |
| 8-Methylsulphinyl-octyl-glucosinolate | MSO8         | 0                                |
