# Supplementary material for: What Can Causal Networks Tell Us about Metabolic Pathways?
Source: PubMed Central journal article supplement (PMC3320578; doi:10.1371/journal.pcbi.1002458), 2012-04-05
Supplement: pcbi.1002458.s005.pdf [file pcbi.1002458.s005.pdf]

**Table S2: Significant QTL: Bay ×Sha metabolites**

| Pheno      | Chr | Pos | LOD    | locus    | PeakMarker |
|------------|-----|-----|--------|----------|------------|
| MT3        | 4   | 10  | 5.497  | c4.loc10 | NGA8       |
| MT3        | 5   | 20  | 26.972 | c5.loc20 | NGA139     |
| MT3        | 5   | 18  | 30.943 | c5.loc18 | MSAT5.14   |
| Allyl      | 4   | 8   | 80.638 | c4.loc8  | MSAT4.8    |
| OHP3       | 4   | 8   | 45.436 | c4.loc8  | MSAT4.8    |
| OHP3       | 5   | 14  | 13.164 | c5.loc14 | MSAT5.14   |
| MT4        | 4   | 12  | 11.865 | c4.loc12 | NGA8       |
| MSO4       | 4   | 10  | 27.995 | c4.loc10 | NGA8       |
| MSO4       | 5   | 20  | 14.999 | c5.loc20 | NGA139     |
| But-3-enyl | 1   | 82  | 2.317  | c1.loc82 | MSAT1.5    |
| But-3-enyl | 4   | 8   | 54.655 | c4.loc8  | MSAT4.8    |
| But-3-enyl | 5   | 8   | 5.02   | c5.loc8  | NGA249     |
| MT7        | 3   | 52  | 3.083  | c3.loc52 | MSAT3.21   |
| MT7        | 4   | 4   | 7.759  | c4.loc4  | MSAT4.8    |
| MT7        | 5   | 14  | 5.376  | c5.loc14 | MSAT5.14   |
| MT8        | 4   | 2   | 3.381  | c4.loc2  | MSAT4.8    |
| MT8        | 5   | 18  | 55.064 | c5.loc18 | MSAT5.14   |
| MSO8       | 4   | 20  | 2.681  | c4.loc20 | NGA8       |
| MSO8       | 5   | 18  | 54.978 | c5.loc18 | MSAT5.14   |
