# Supplementary material for: What Can Causal Networks Tell Us about Metabolic Pathways?
Source: PubMed Central journal article supplement (PMC3320578; doi:10.1371/journal.pcbi.1002458), 2012-04-05
Supplement: pcbi.1002458.s006.pdf [file pcbi.1002458.s006.pdf]

**Table S3: Summary of two-locus genome scans: Bay × Sha metabolites**

| Metabolite | chr1 | chr2 | pos1f | pos2f | lod.full | lod.fv1 | lod.int | pos1a | pos2a | lod.add | lod.av1 |
|------------|------|------|-------|-------|----------|---------|---------|-------|-------|---------|---------|
| MT3        | 4    | 5    | 6.00  | 20.00 | 28.71    | 9.40    | 1.94    | 6.00  | 18.00 | 26.77   | 7.46    |
| MT3        | 5    | 5    | 20.00 | 62.00 | 23.39    | 4.08    | 0.26    | 20.00 | 60.00 | 23.12   | 3.82    |
| Allyl      | 4    | 5    | 8.00  | 18.00 | 73.93    | 13.89   | 7.11    | 10.00 | 18.00 | 66.82   | 6.78    |
| OHP3       | 4    | 5    | 8.00  | 20.00 | 66.95    | 31.71   | 10.16   | 10.00 | 20.00 | 56.79   | 21.55   |
| MT4        | 4    | 5    | 10.00 | 18.00 | 66.56    | 42.76   | 20.13   | 10.00 | 18.00 | 46.43   | 22.63   |
| MSO4       | 4    | 5    | 8.00  | 18.00 | 72.96    | 47.38   | 21.74   | 8.00  | 18.00 | 51.22   | 25.64   |
| But-3-enyl | 4    | 5    | 10.00 | 18.00 | 85.49    | 51.40   | 31.37   | 8.00  | 18.00 | 54.12   | 20.03   |
| MT7        | 4    | 5    | 4.00  | 12.00 | 14.53    | 7.08    | 0.15    | 4.00  | 12.00 | 14.38   | 6.92    |
| MT8        | 4    | 5    | 2.00  | 18.00 | 63.50    | 12.38   | 1.38    | 2.00  | 18.00 | 62.12   | 11.01   |
