# Supplementary material for: What Can Causal Networks Tell Us about Metabolic Pathways?
Source: PubMed Central journal article supplement (PMC3320578; doi:10.1371/journal.pcbi.1002458), 2012-04-05
Supplement: pcbi.1002458.s007.pdf [file pcbi.1002458.s007.pdf]

**Text S1:** Graphical models were reconstructed using a MCMC algorithm. The result is an ensemble of graphs, each with a posterior probability. Here we present different summarizations of the Bay x Sha reconstructed networks based on model selection and marginal summaries over the most probable graphs.

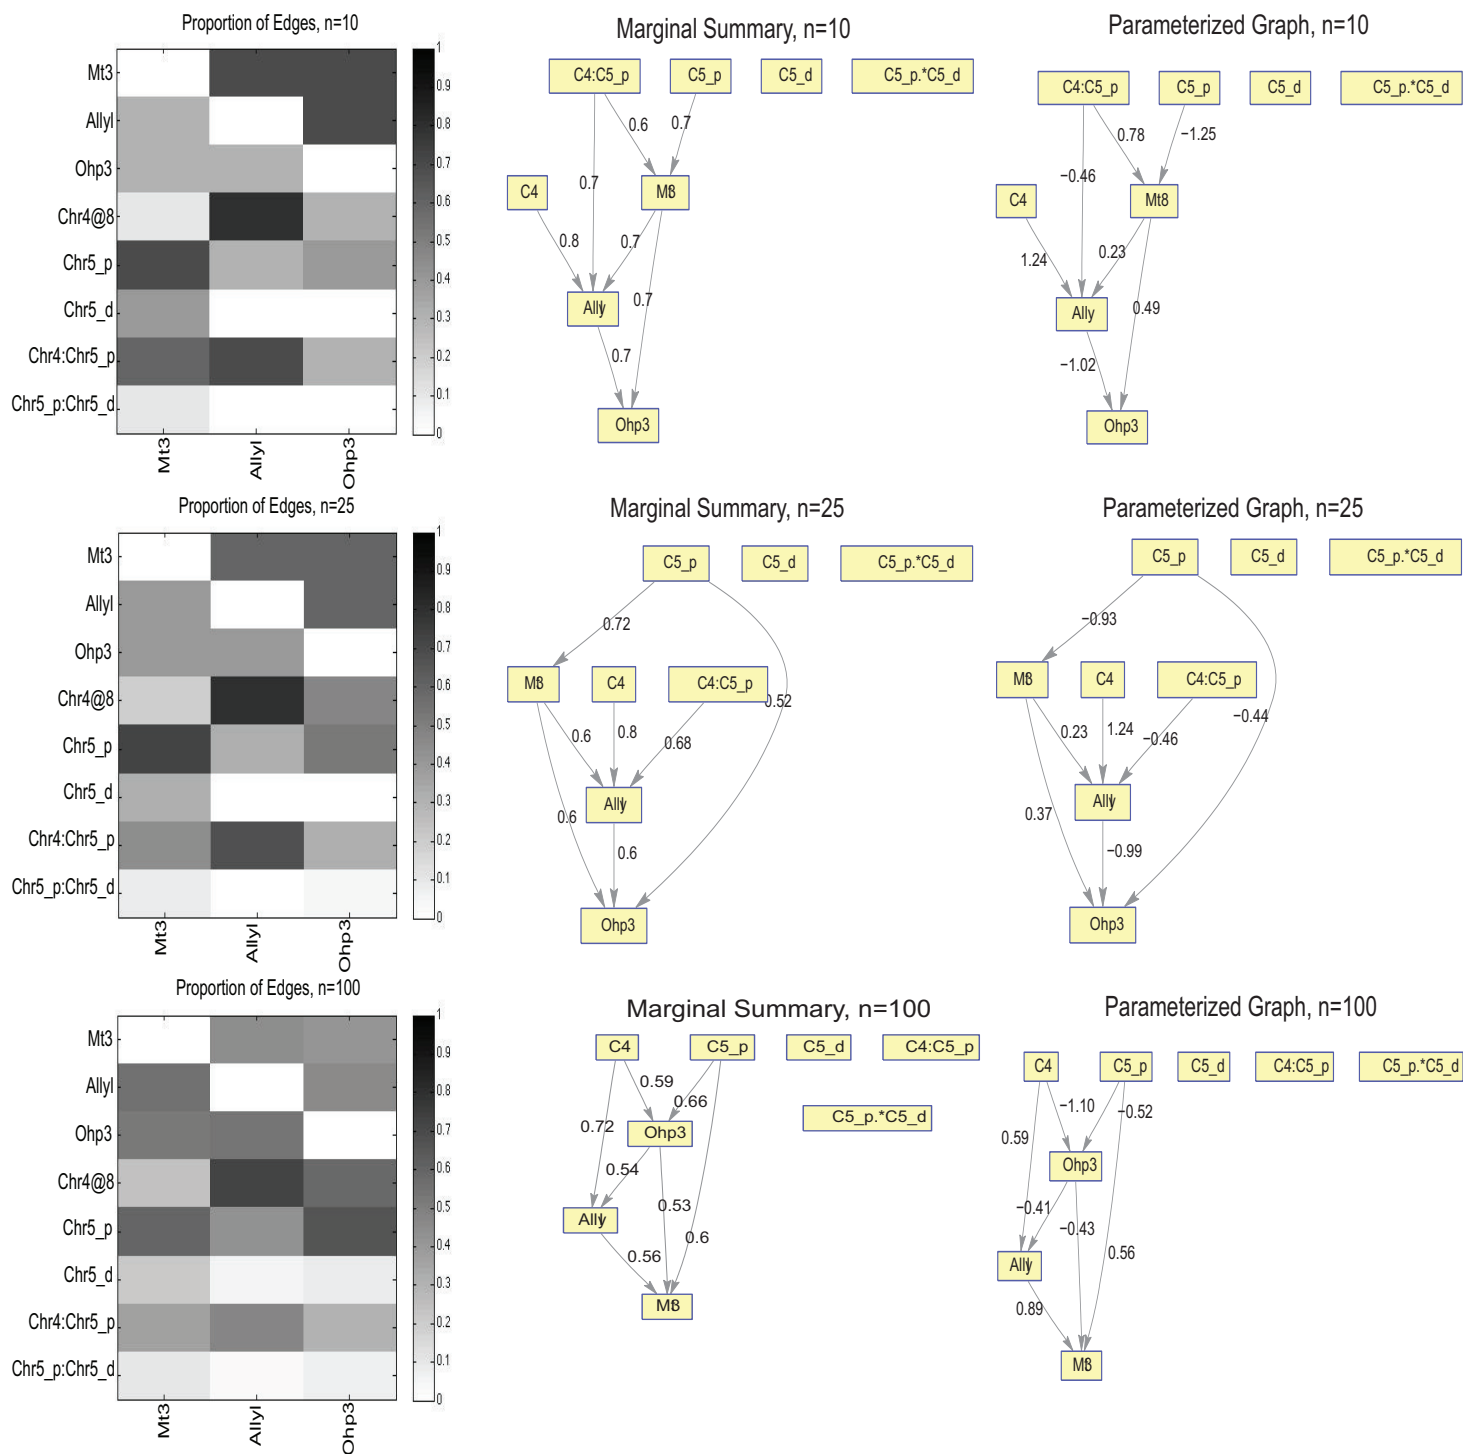

**Figure 1. Homo-methionine sidechain network reconstructions.** The results are shown for the top scoring  $n = 10, 25$  and  $100$  graphs (top - bottom) identified through MCMC sampling. For each  $n$  the proportion of edges present in the summary, marginal summary based on edge proportion of at least 0.5 and the parameterized model is shown (left - right).

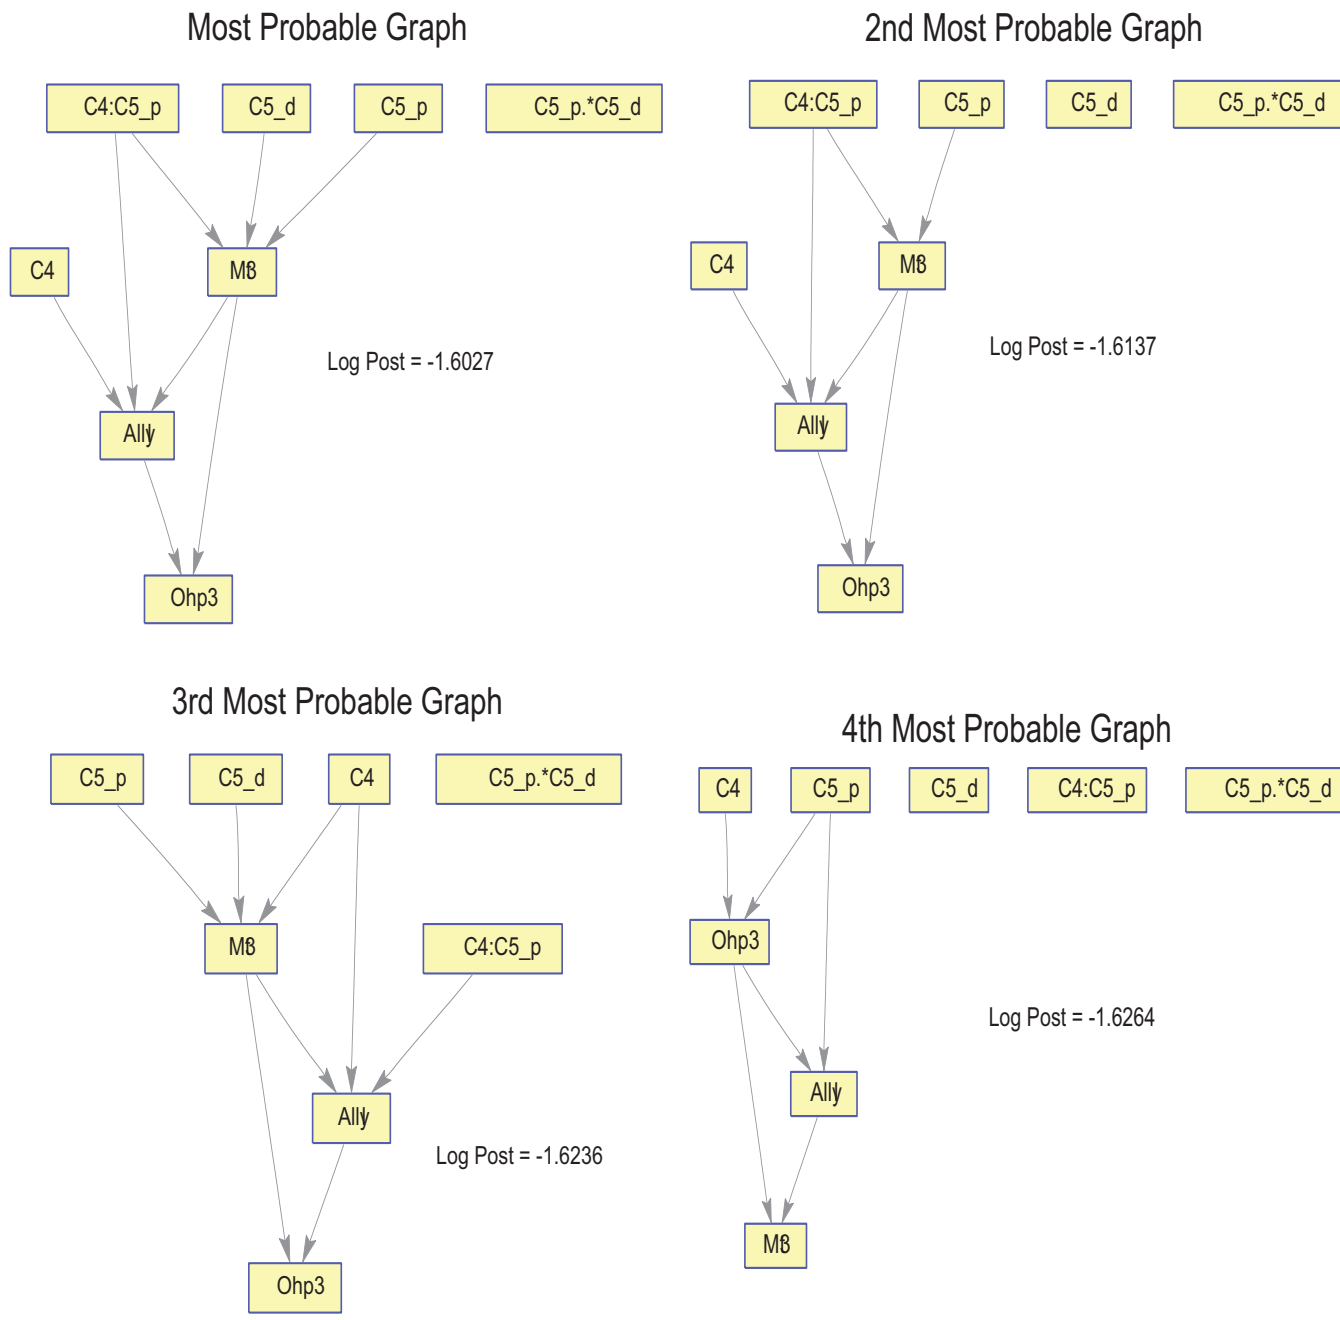

**Figure 2. Homo-methionine sidechain** top four parameterized network reconstructions and their posterior probabilities.

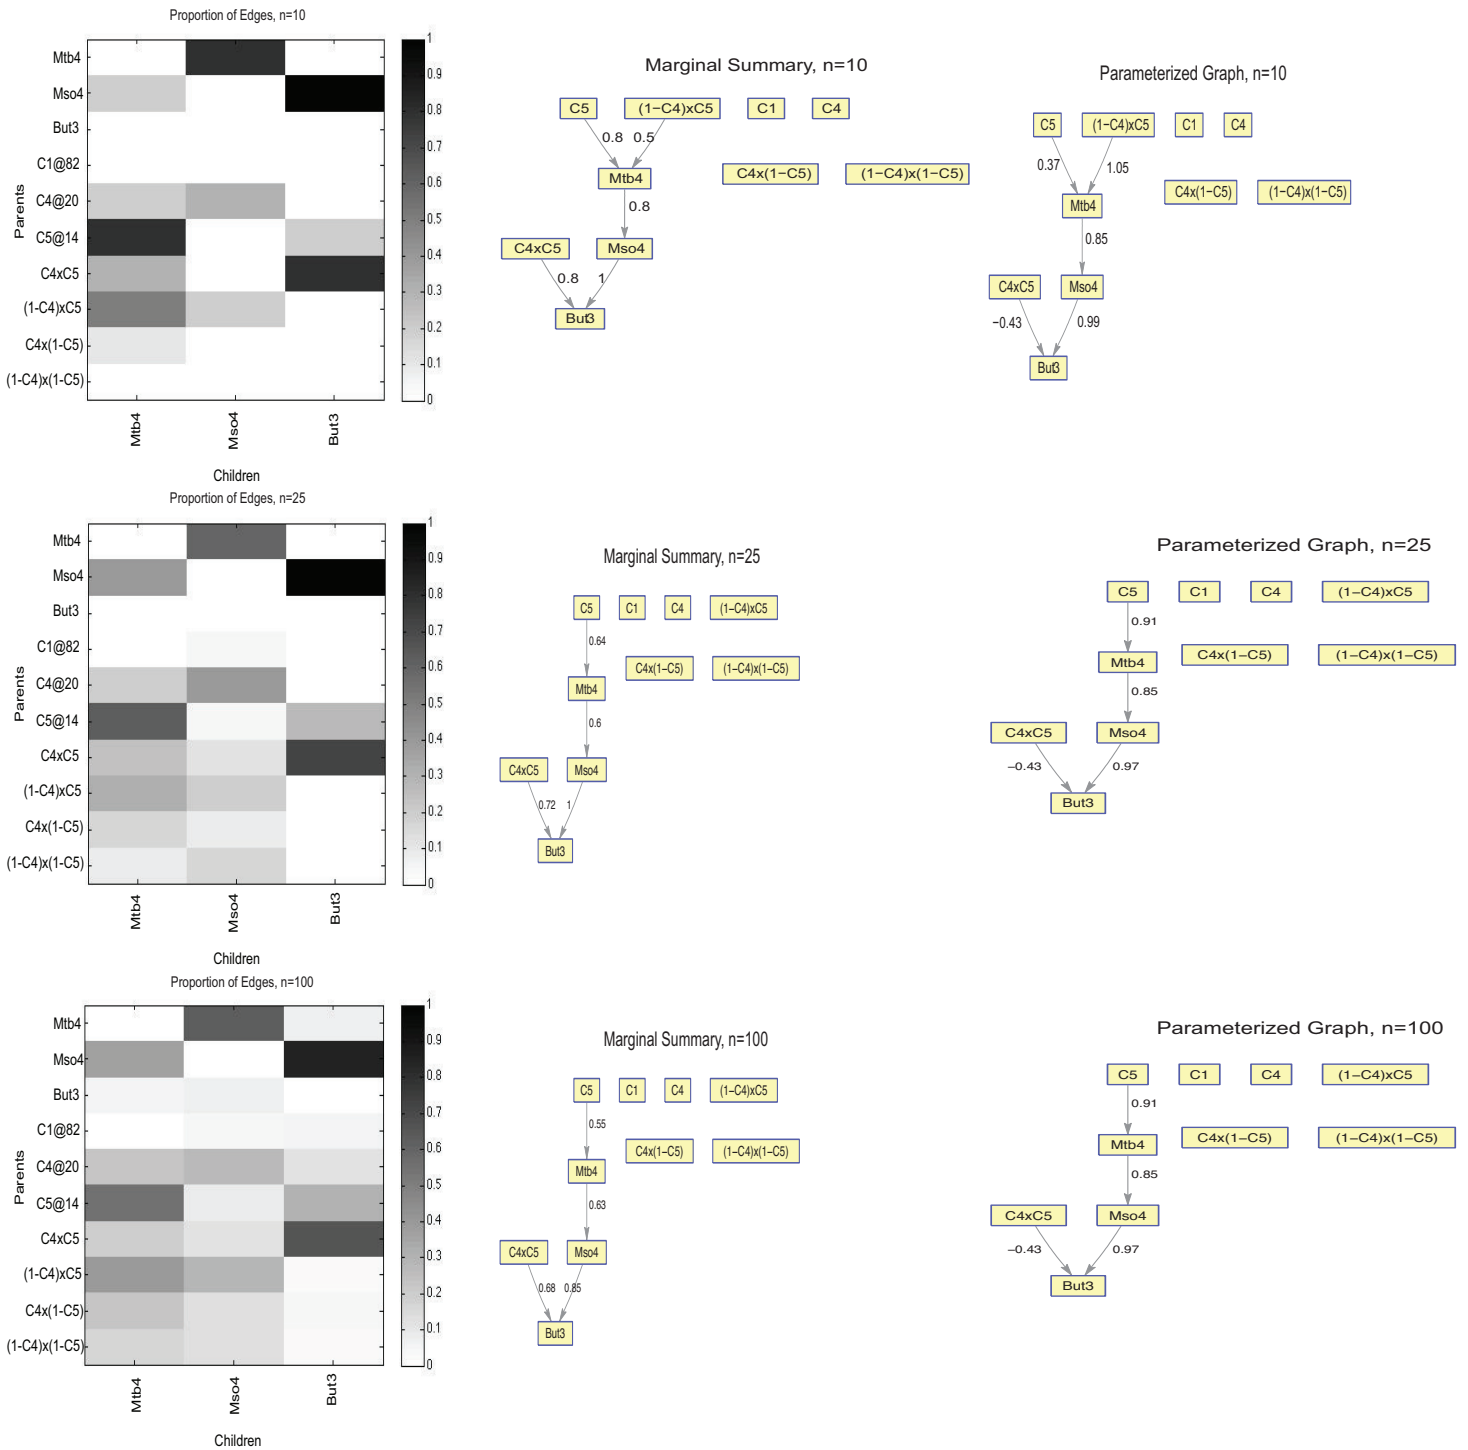

**Figure 3. Dihomo-methionine sidechain network reconstructions.** The results are shown for the top scoring  $n = 10, 25$  and  $100$  graphs (top - bottom) identified through MCMC sampling. For each  $n$  the proportion of edges present in the summary, marginal summary based on edge proportion of at least  $0.5$  and the parameterized model is shown (left - right).

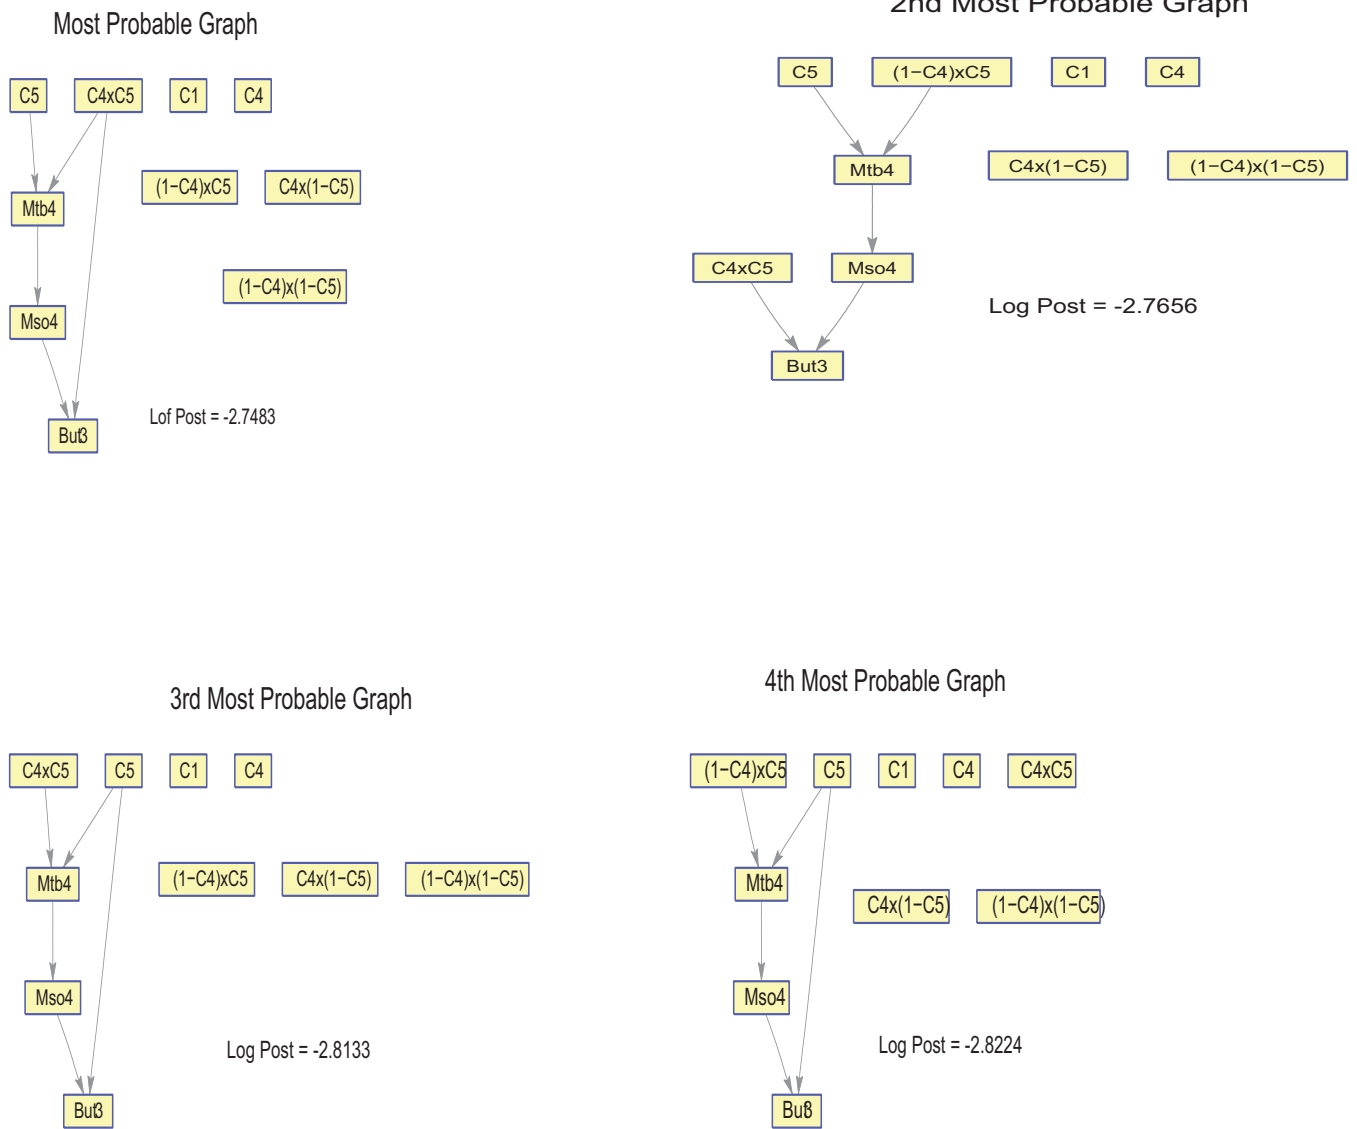

**Figure 4. Dihomo-methionine sidechain** top four parameterized network reconstructions and their posterior probabilities.

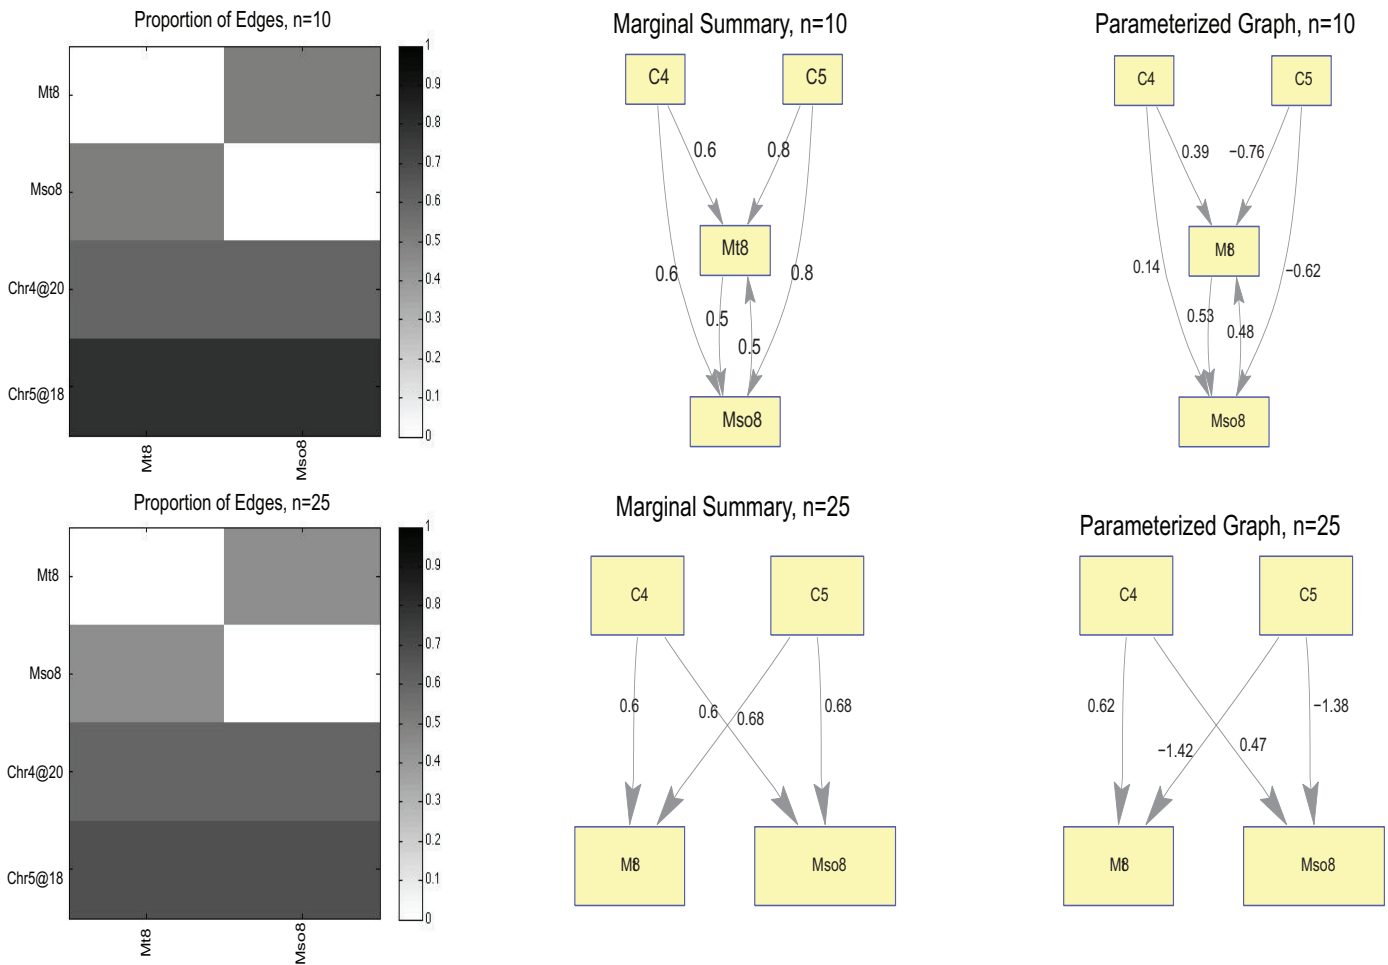

**Figure 5. Hexa-methionine sidechain network reconstructions.** The results are shown for the top scoring  $n = 10, 25$  and  $100$  graphs (top - bottom) identified through MCMC sampling. For each  $n$  the proportion of edges present in the summary, marginal summary based on edge proportion of at least  $0.5$  and the parameterized model is shown (left - right).

Most Probable Graph

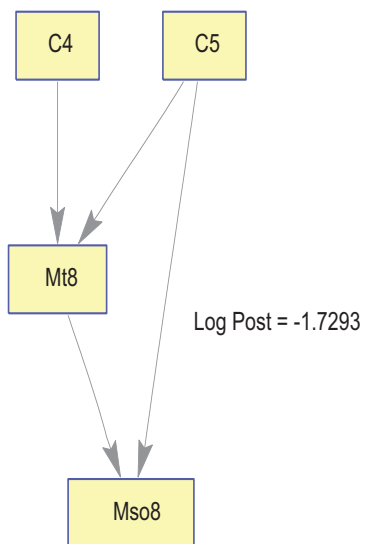

2nd Most Probable Graph

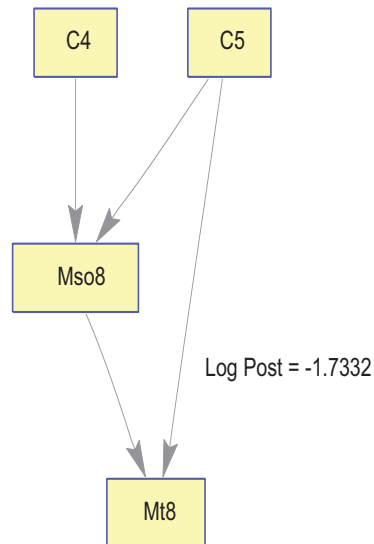

3rd Most Probable Graph

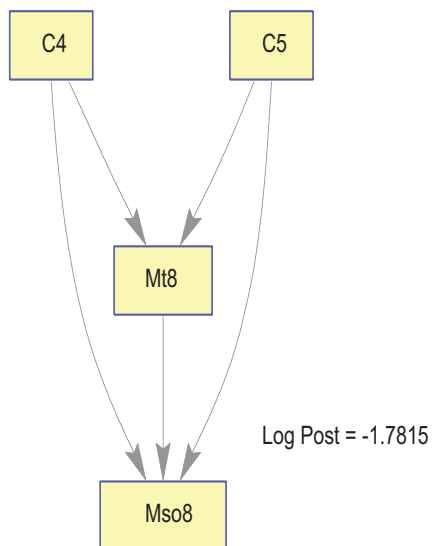

4th Most Probable Graph

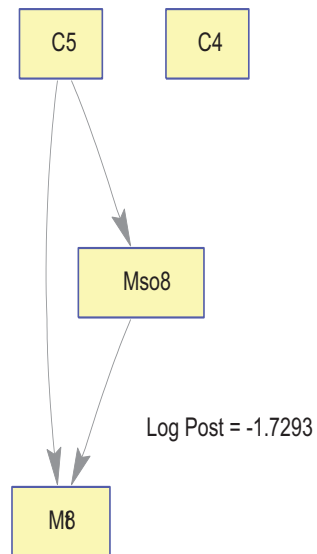

**Figure 6. Hexa-methionine sidechain** top four parameterized network reconstructions and their posterior probabilities.

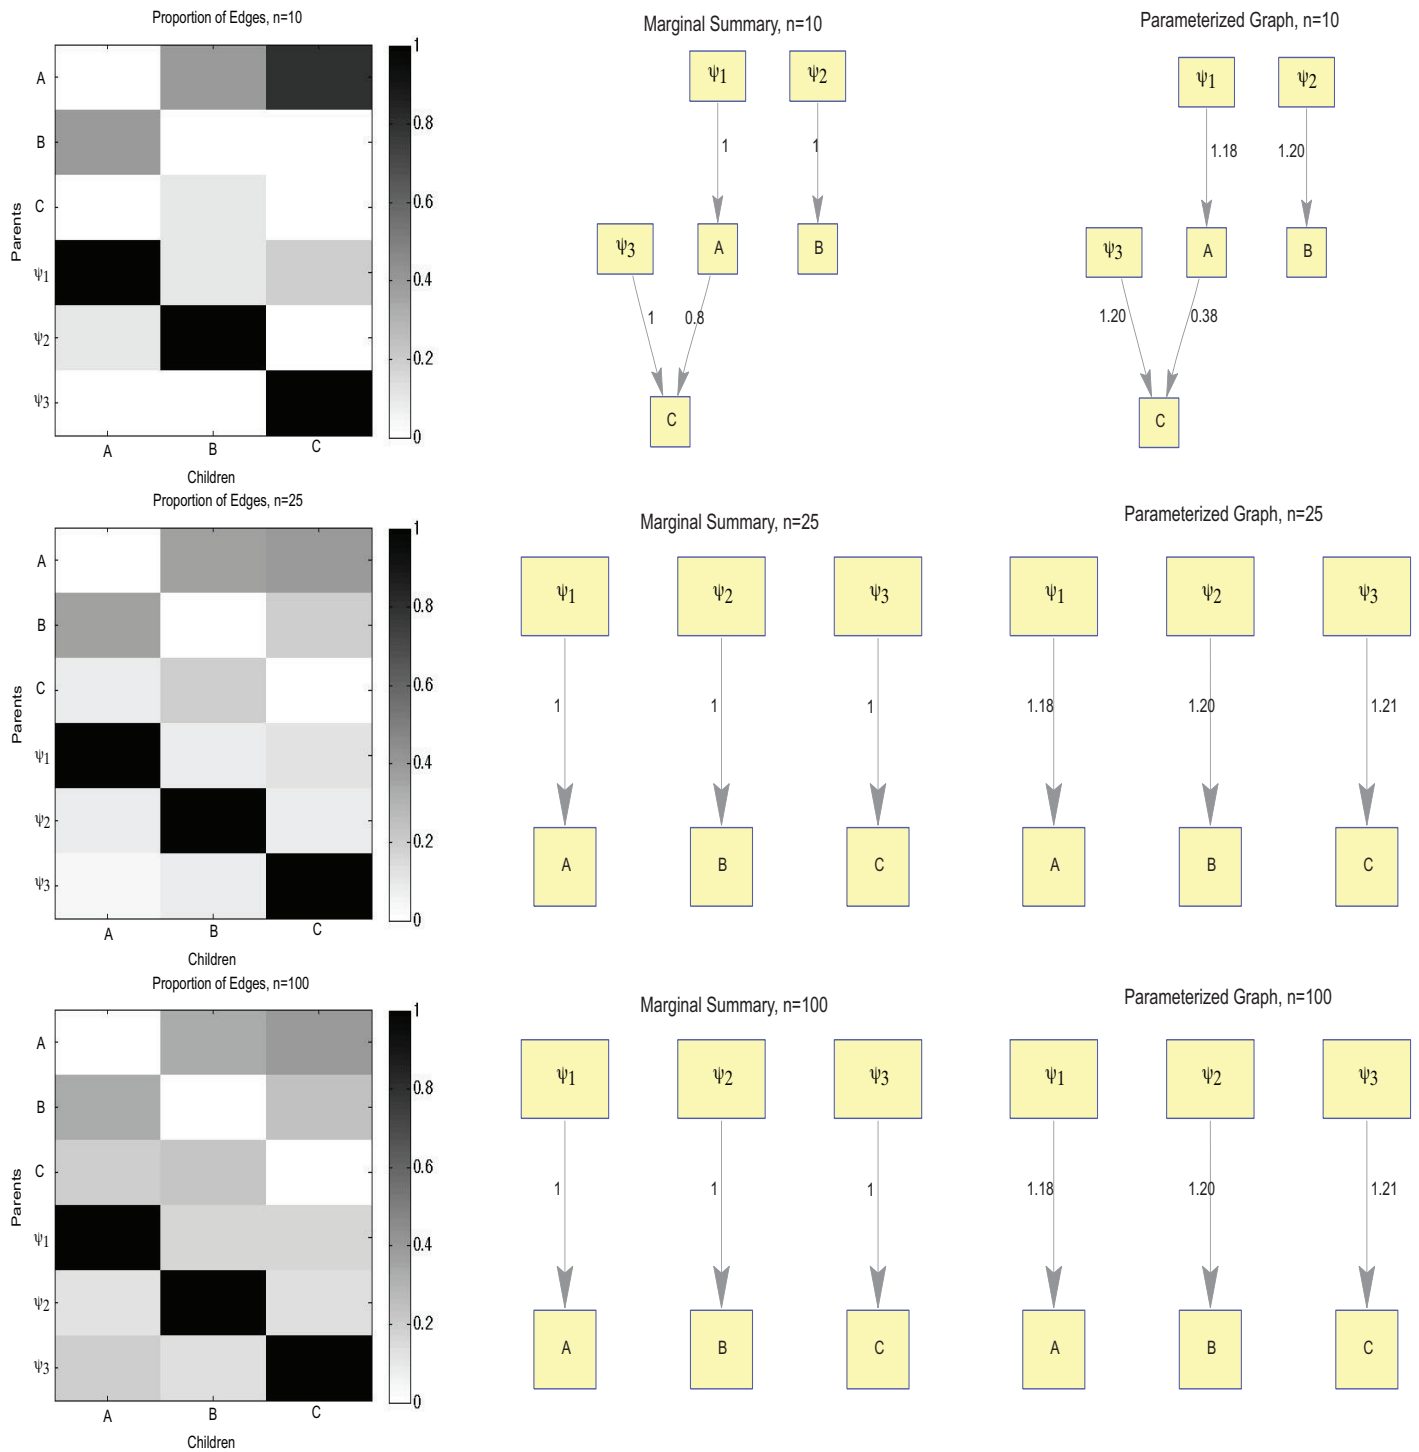

**Figure 7. Linear pathway network reconstructions.** The results are shown for the top scoring  $n = 10, 25$  and  $100$  graphs (top - bottom) identified through MCMC sampling. For each  $n$  the proportion of edges present in the summary, marginal summary based on edge proportion of at least 0.5 and the parameterized model is shown (left - right).



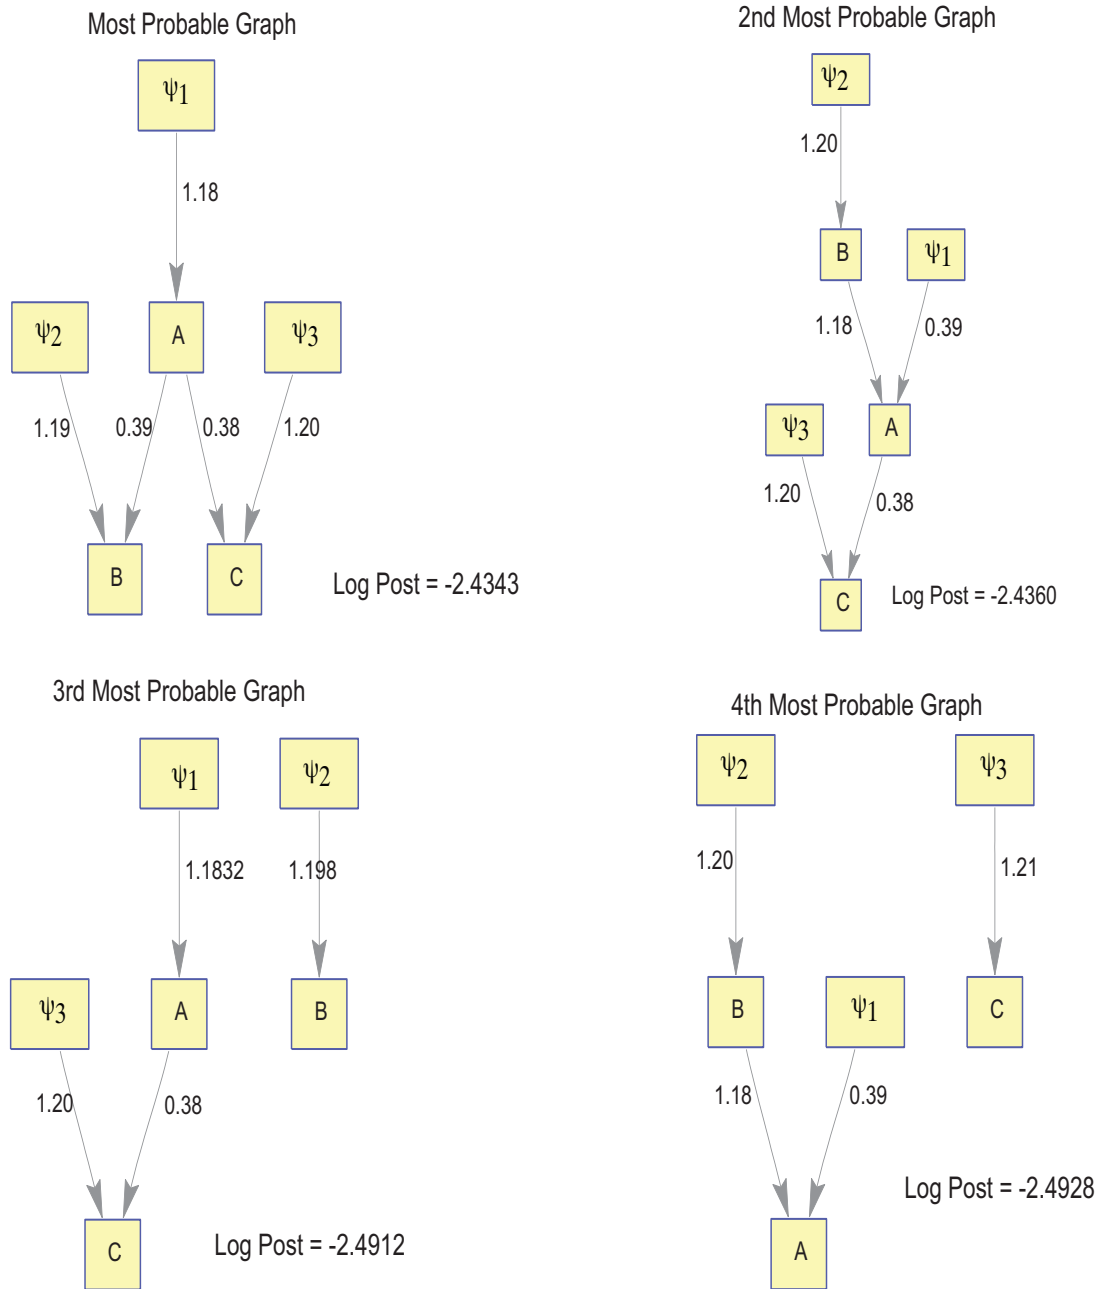

**Figure 8. Linear pathway** top four parameterized network reconstructions and their posterior probabilities.

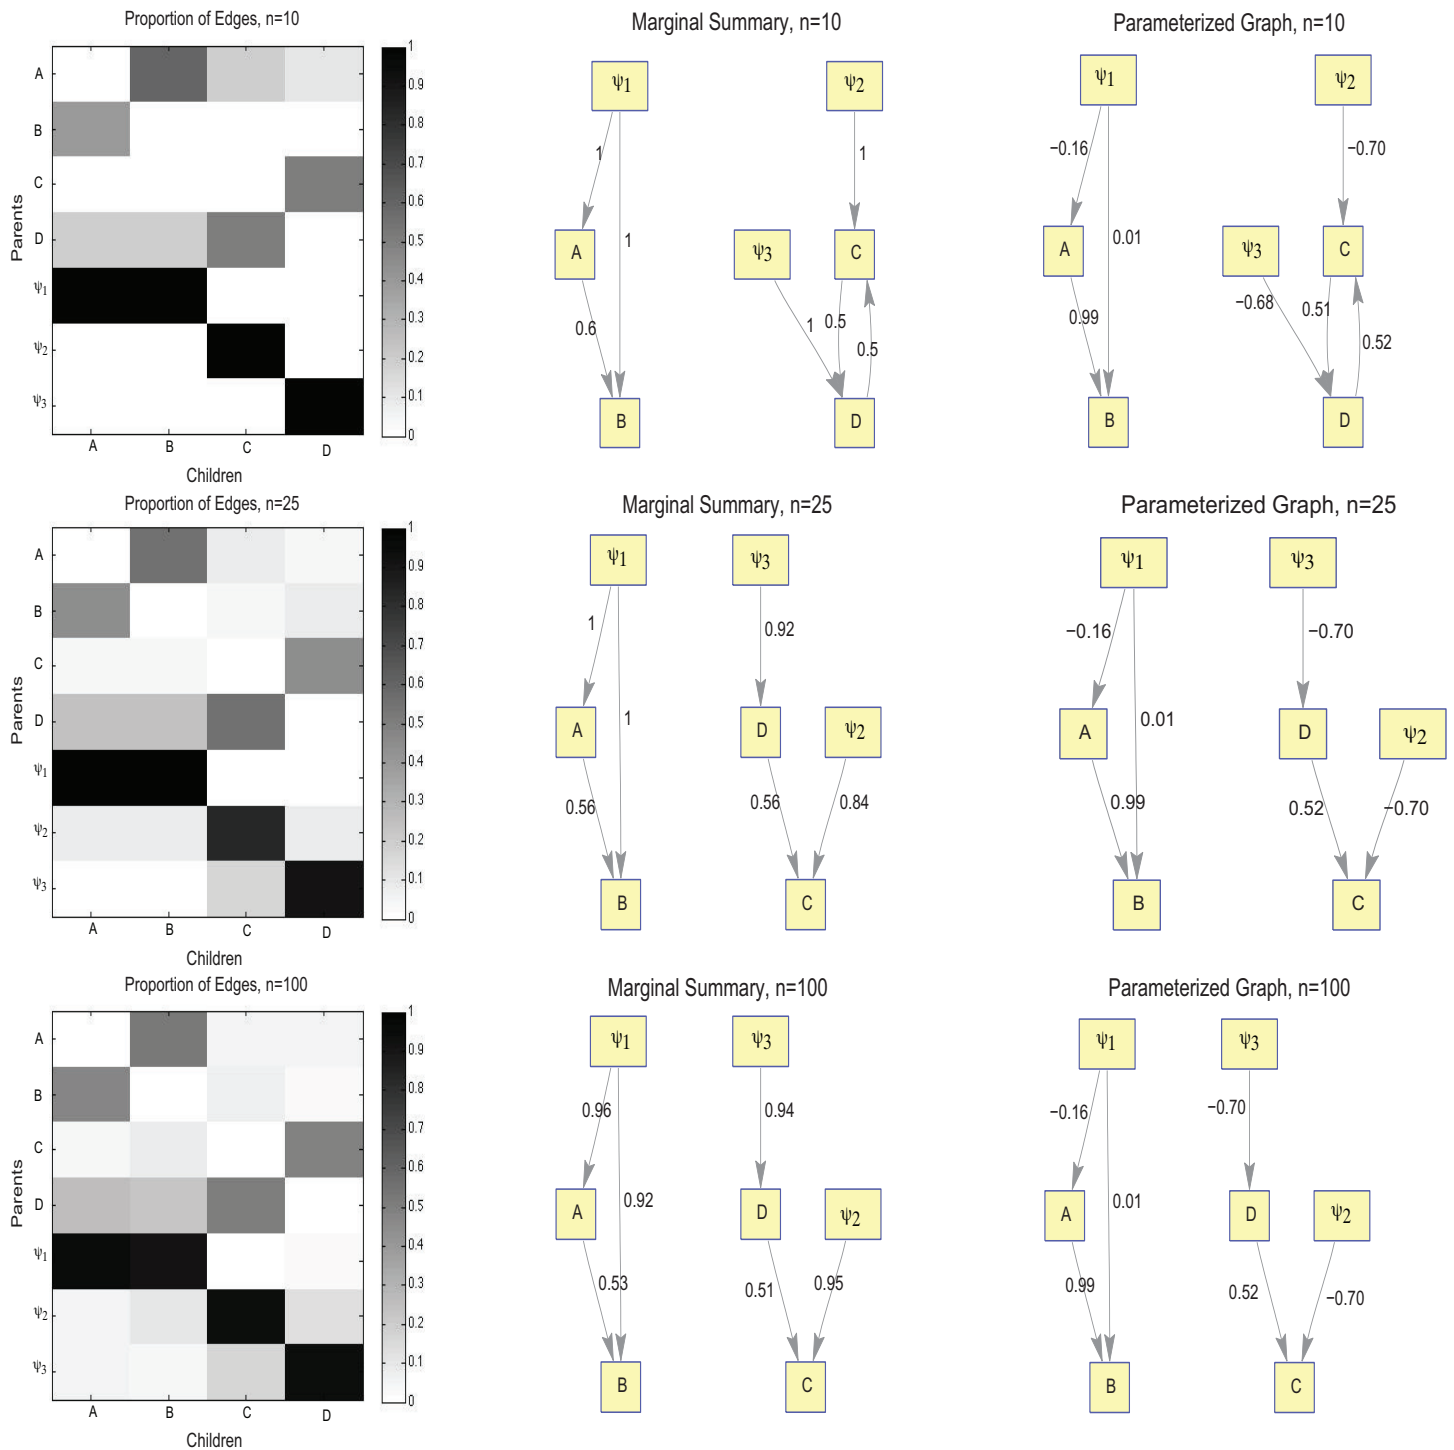

**Figure 9. Merging pathway via metabolic reaction network reconstructions.** The results are shown for the top scoring  $n = 10, 25$  and  $100$  graphs (top - bottom) identified through MCMC sampling. For each  $n$  the proportion of edges present in the summary, marginal summary based on edge proportion of at least 0.5 and the parameterized model is shown (left - right).

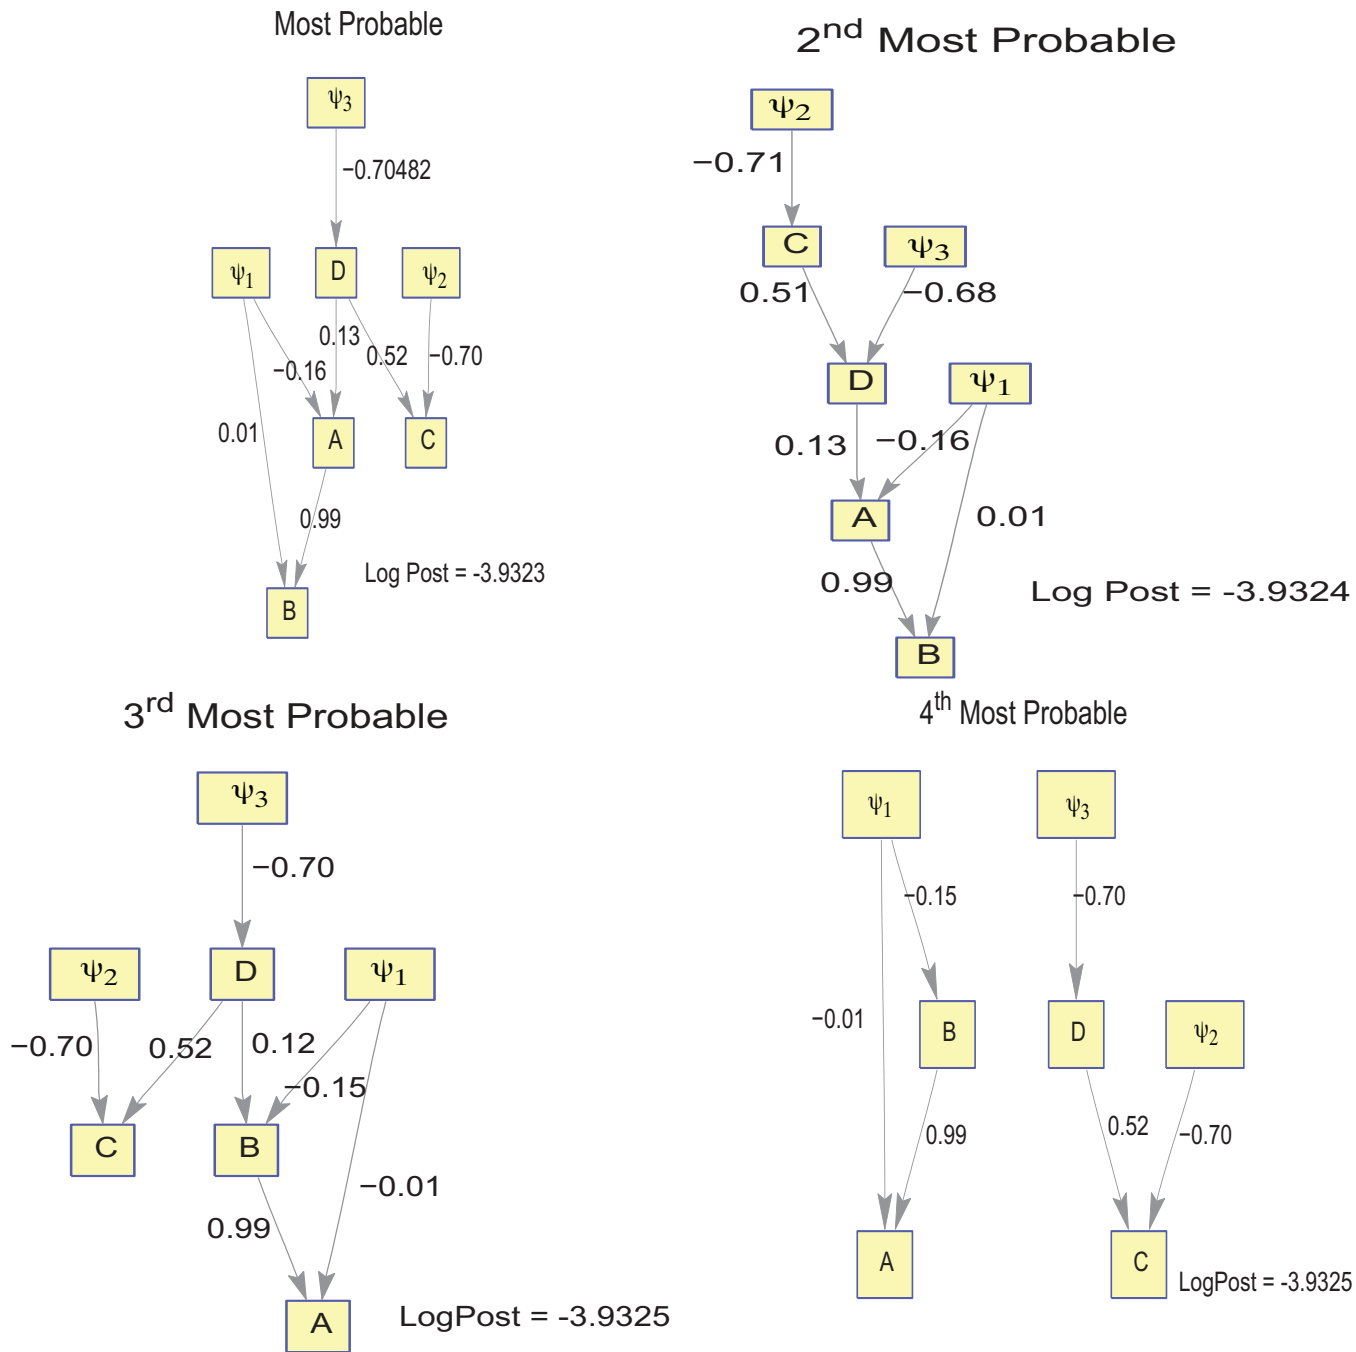

**Figure 10. Merging pathway via metabolic reaction** top four parameterized network reconstructions and their posterior probabilities.

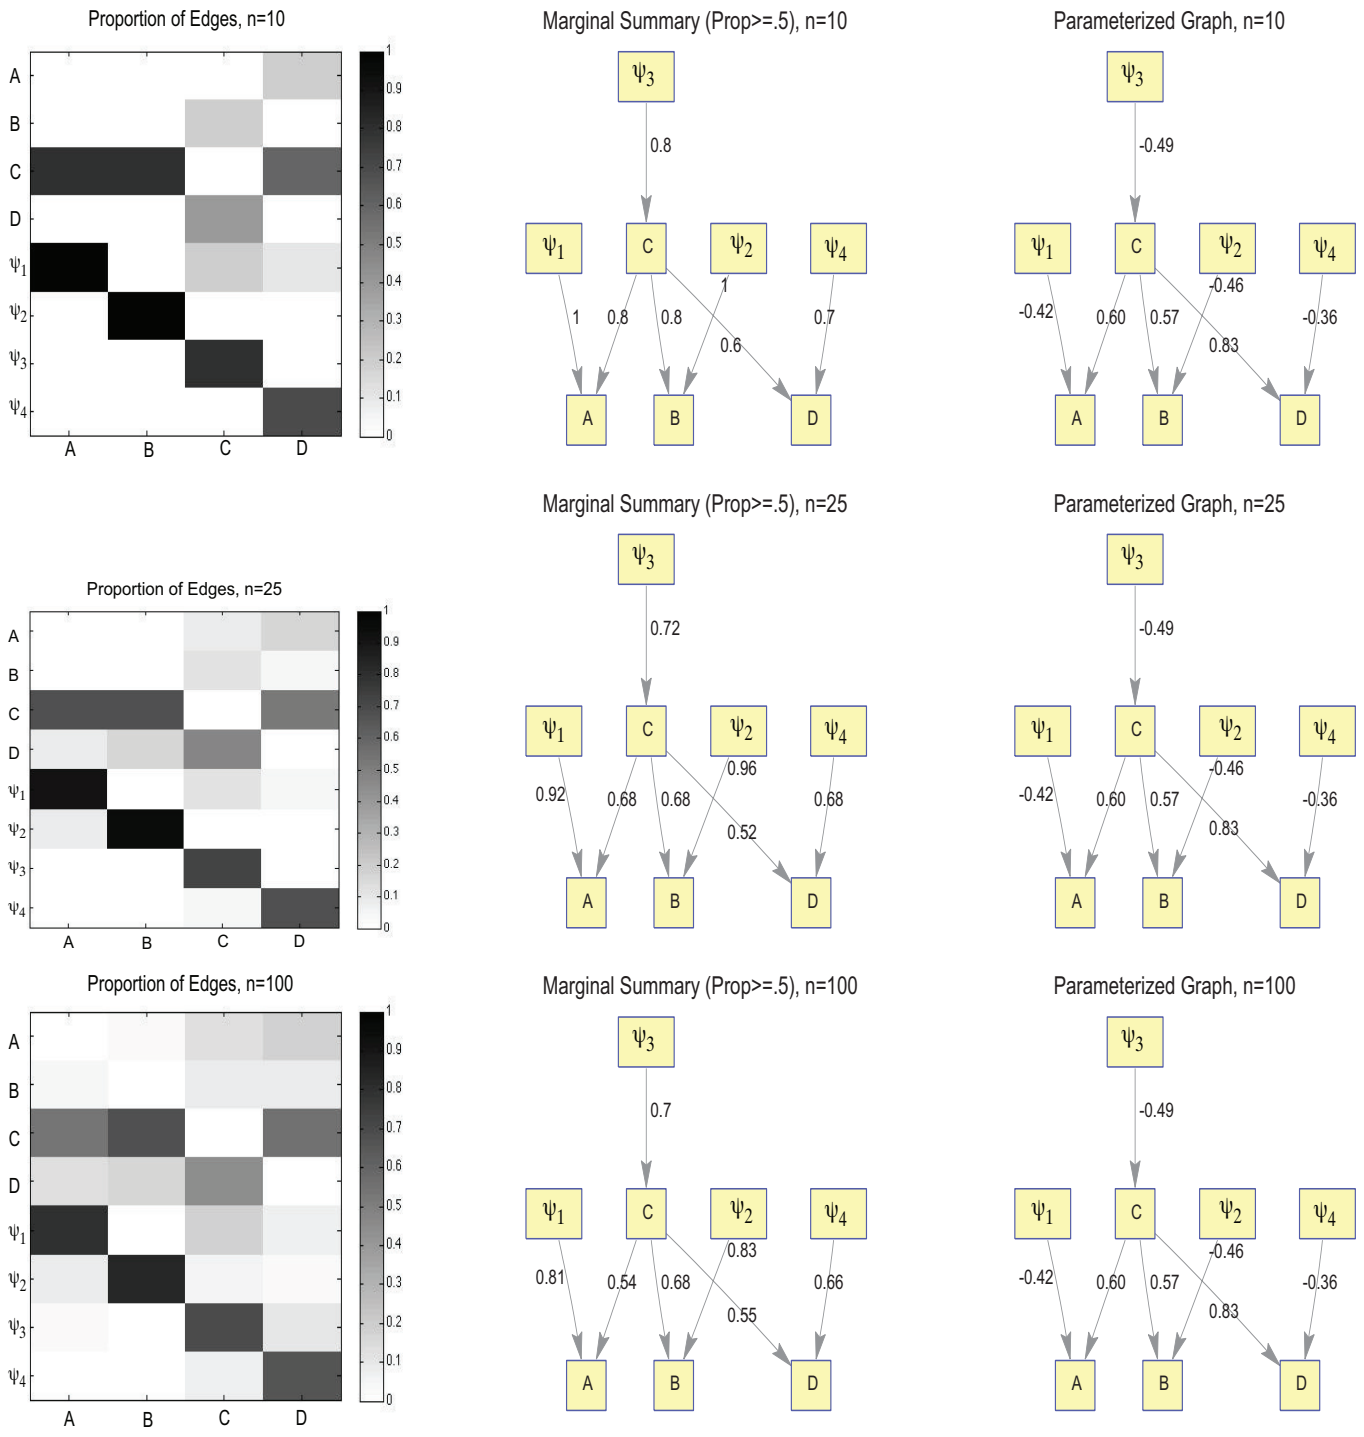

**Figure 11. Merging pathway via independent paths network reconstructions.** The results are shown for the top scoring  $n = 10, 25$  and  $100$  graphs (top - bottom) identified through MCMC sampling. For each  $n$  the proportion of edges present in the summary, marginal summary based on edge proportion of at least 0.5 and the parameterized model is shown (left - right).

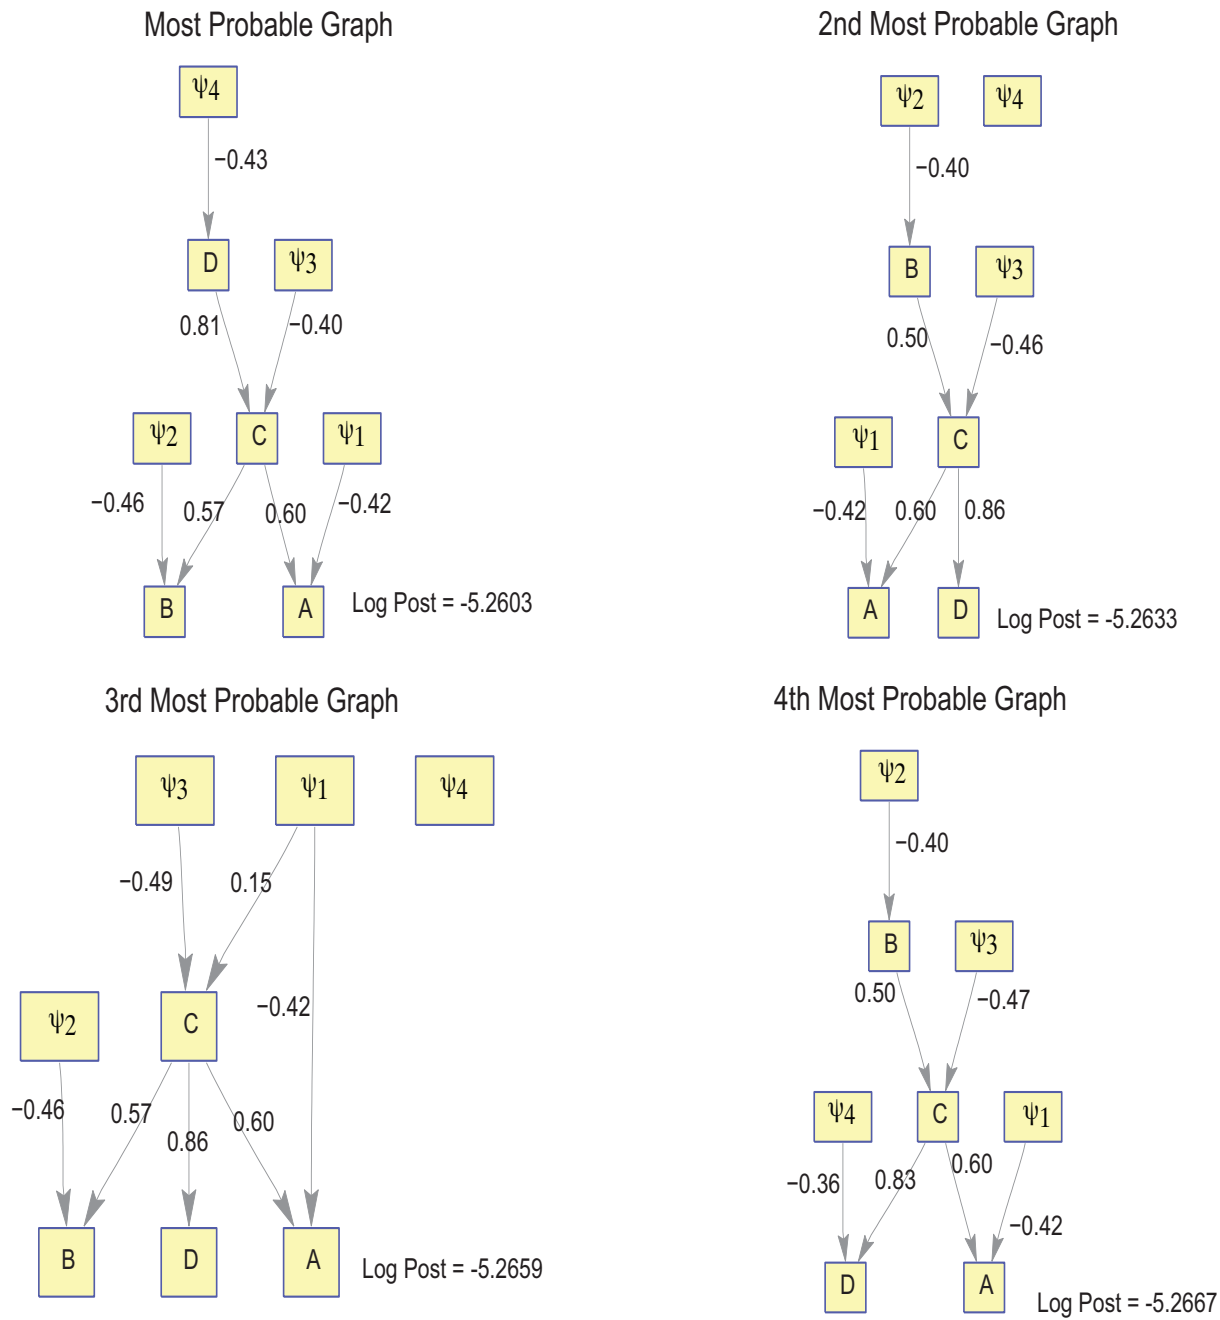

**Figure 12. Merging pathway via independent paths** top four parameterized network reconstructions and their posterior probabilities.

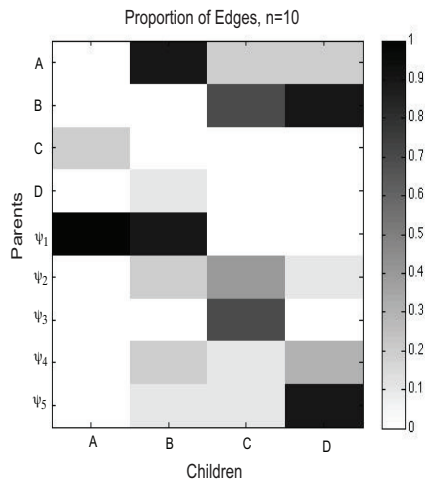

Marginal Summary (Prop>=0.5), n=10

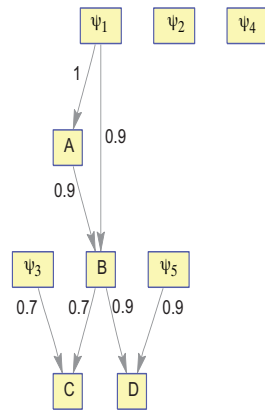

Parameterized Graph, n=10

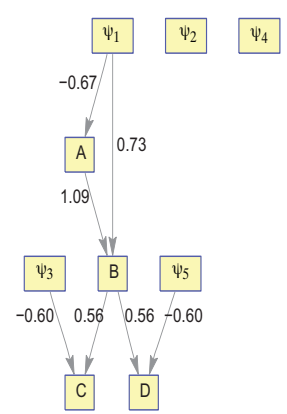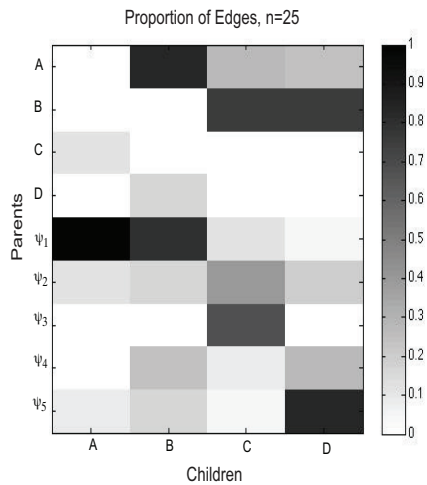

Marginal Summary (Prop>=0.5), n=25

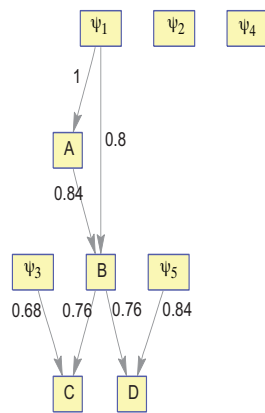

Parameterized Graph, n=25

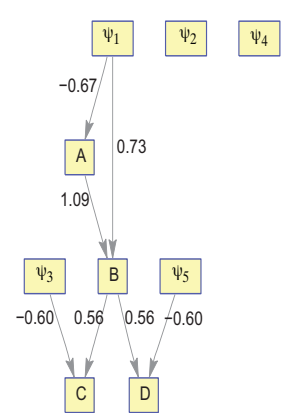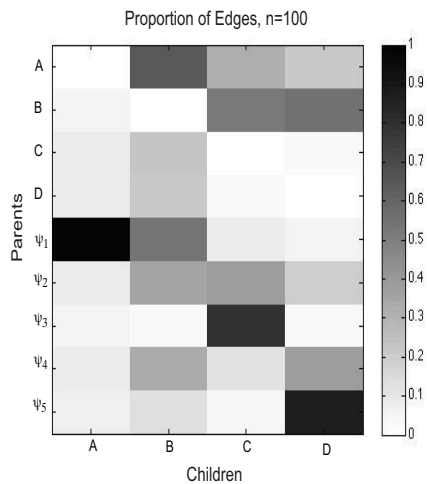

Marginal Summary (Prop>=0.5), n=100

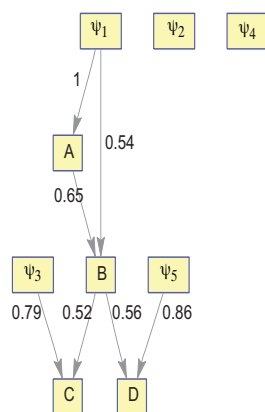

Parameterized Graph, n=100

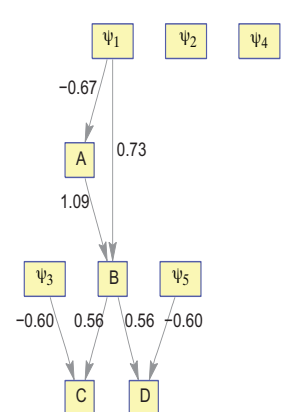

**Figure 13. Branching pathway network reconstructions.** The results are shown for the top scoring  $n = 10, 25$  and  $100$  graphs (top - bottom) identified through MCMC sampling. For each  $n$  the proportion of edges present in the summary, marginal summary based on edge proportion of at least 0.5 and the parameterized model is shown (left - right).

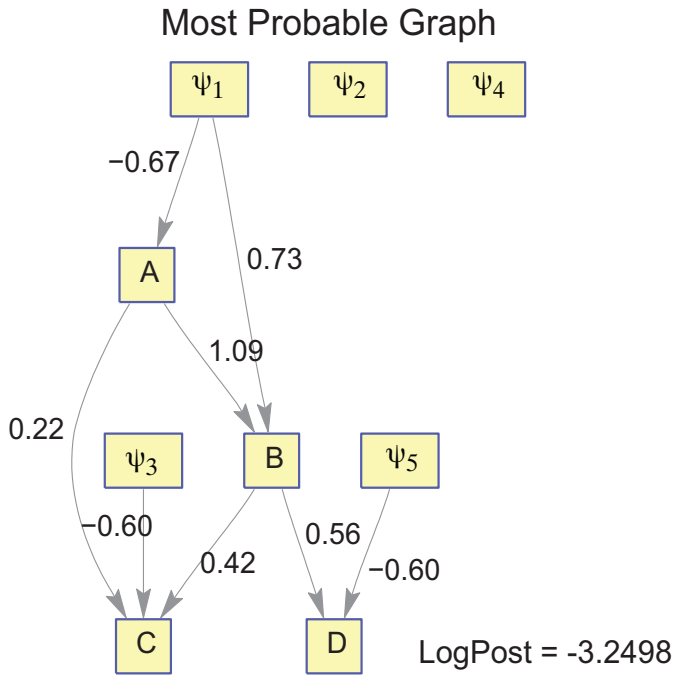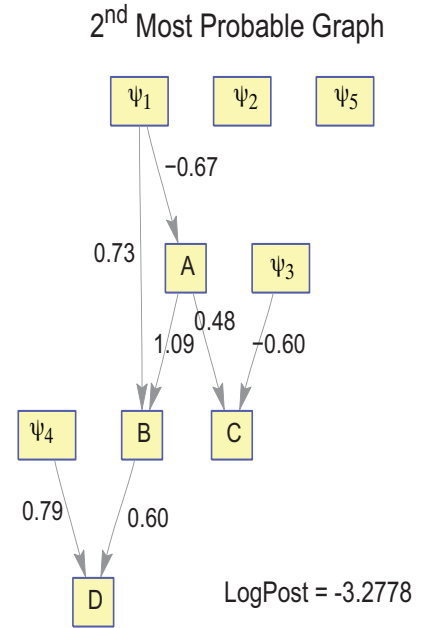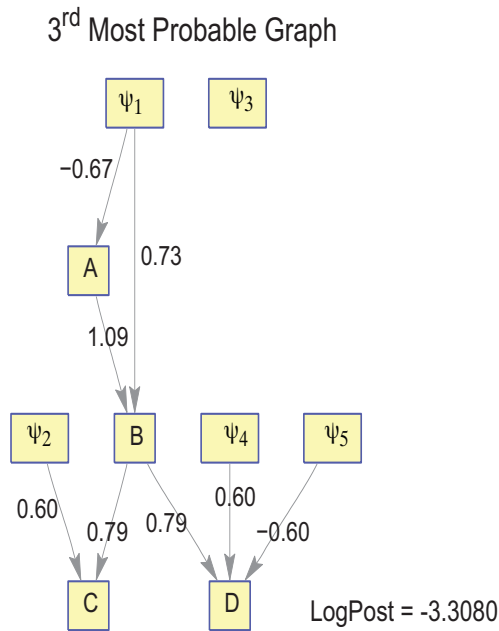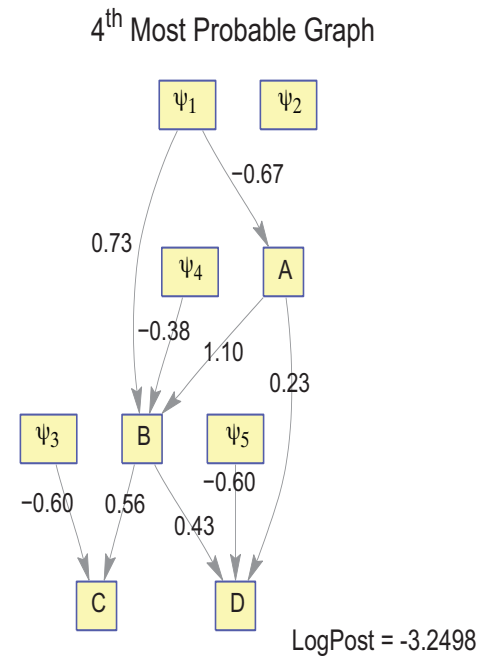

**Figure 14. Branching pathway** top four parameterized network reconstructions and their posterior probabilities.

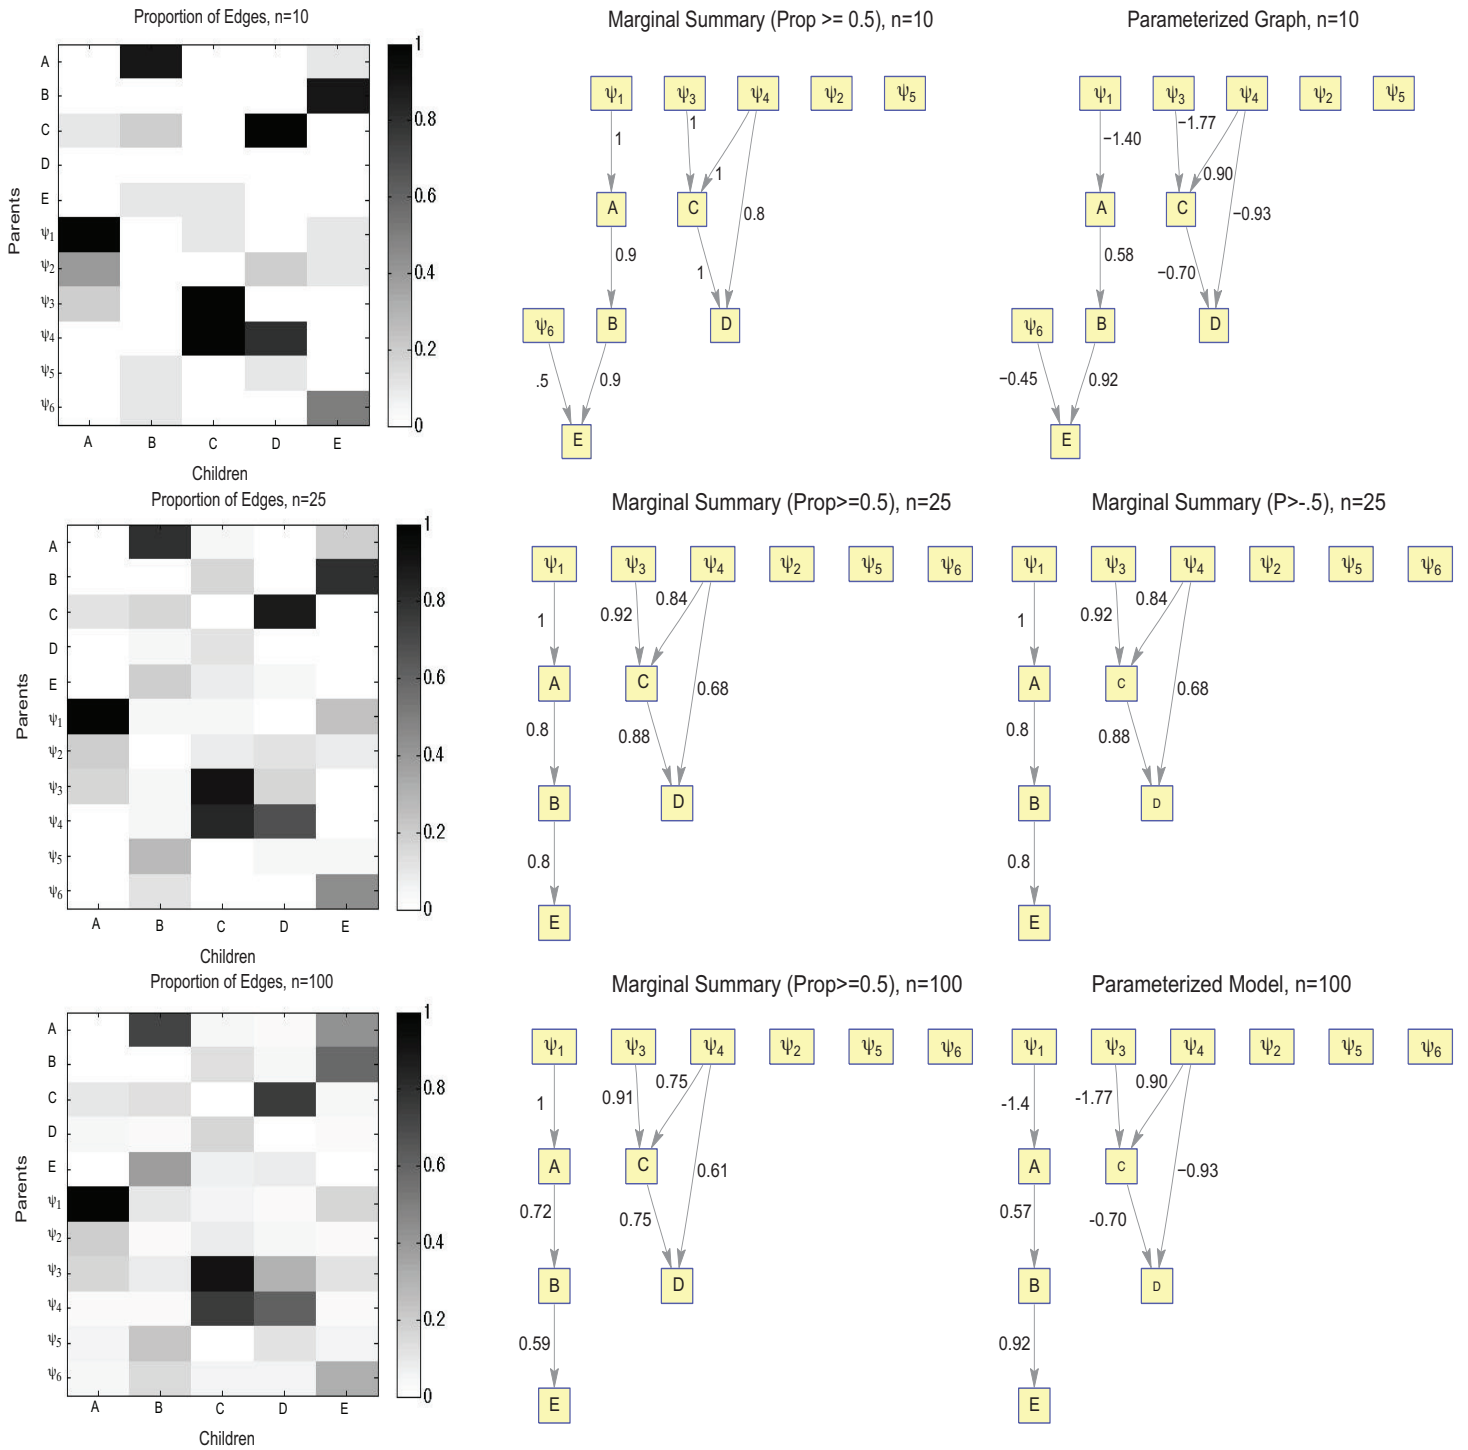

**Figure 15. Branching pathway with metabolic inhibition network reconstructions.** The results are shown for the top scoring  $n = 10, 25$  and  $100$  graphs (top - bottom) identified through MCMC sampling. For each  $n$  the proportion of edges present in the summary, marginal summary based on edge proportion of at least 0.5 and the parameterized model is shown (left - right).



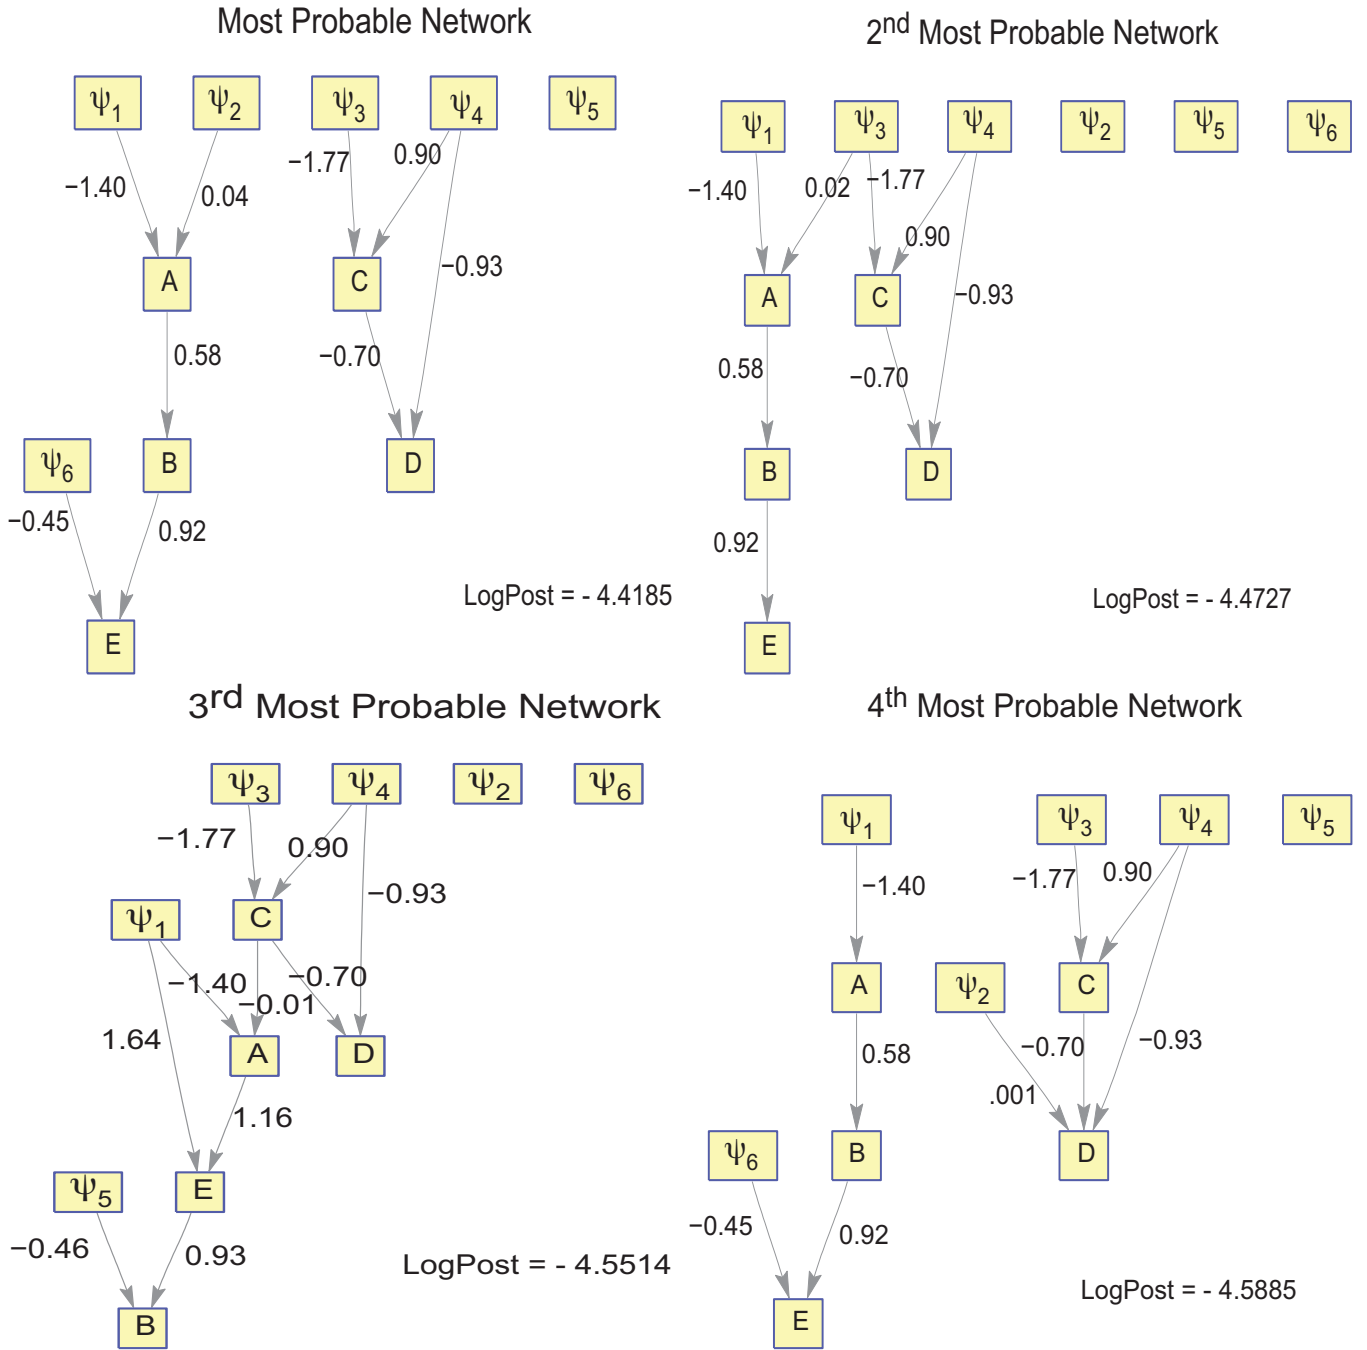

**Figure 16. Branching pathway with metabolic inhibition top four parameterized network reconstructions and their posterior probabilities.**
